# Supplementary material for: Dynamics of naphthenic acids and microbial community structures in a membrane bioreactor treating oil sands process-affected water: impacts of supplemented inorganic nitrogen and hydraulic retention time
Source: Royal Society of Chemistry journal article supplement (doi:10.1039/c7ra01836c), 2017-01-01
Supplement: c7ra01836c1.pdf [file c7ra01836c1.pdf]

**Supporting Information: Dynamics of naphthenic acids and microbial  
community structures in a membrane bioreactor treating oil sands process-  
affected water: impacts of supplemented inorganic nitrogen and hydraulic  
retention time**

Jinkai Xue<sup>1,2</sup>, Yanyan Zhang<sup>1,3</sup>, Yang Liu<sup>1</sup>, Mohamed Gamal El-Din<sup>1</sup>

<sup>1</sup>Department of Civil and Environmental Engineering, University of Alberta, Edmonton, Alberta, T6G  
1H9, Canada; <sup>2</sup>Department of Civil, Environmental, and Geo- Engineering, University of Minnesota,  
Minneapolis, Minnesota 55404, United States; <sup>3</sup> Department of Civil Engineering, New Mexico State  
University, Las Cruces, New Mexico, United States

Supporting information includes 7 tables, 5 figures, and 17 pages in total.

## Water chemistry analyses

Samples were collected weekly from the feed by using a disposable syringe, and from the permeate by leaving the effluent tubing in a clean glass bottle until a volume of 100 mL was achieved. Right after sample collection, Thermo Scientific™ Target2™ Nylon Syringe Filters (0.22 µm) were used to filter water samples prior to analyses. Conventional water chemistry parameters including pH, COD, nitrate nitrogen (NO<sub>3</sub>-N), ammonium nitrogen (NH<sub>4</sub>-N), and nitrite nitrogen (NO<sub>2</sub>-N) were measured for the feed and permeate samples in duplicates according to the standard methods (Federation and Association, 2005). To measure the mixed liquor suspended solids (MLSS) and mixed liquor volatile suspended solids (MLVSS) concentration (an indicator of microbial growth), a 30 mL sludge sample was collected weekly from the middle depth of the anoxic and aerobic tanks by using a disposable syringe. The aforementioned analyses were performed right after the samples were collected and pre-filtered. Dissolved oxygen (DO) concentrations in the anoxic and aerobic tanks were monitored through plugging a DO meter (YSI 50B Dissolved Oxygen Meter) probe into the reactor tanks to ensure that anoxic and aerobic conditions were achieved in corresponding tanks. To assess the MBR's performance in reducing the aquatic toxicity of the feed OSPW, the 81.9% screening test Microtox bioassay protocol was performed. The light emitted by the photobacterium *Vibrio fischeri* as a result of its normal metabolic activities was measured using a model 500 Microtox® analyzer (Strategic Diagnostic Inc.). Detailed information on the toxicity analysis is available elsewhere (Chelme-Ayala et al., 2010).

## **UPLC/HRMS analysis**

Chromatographic separations were run on a Waters UPLC Phenyl BEH column (150 × 1 mm, 1.7 μm) using a gradient mobile phase of (A) 10 mM ammonium acetate solution prepared in Optima-grade water and (B) 10 mM ammonium acetate in 50% methanol and 50% acetonitrile, both Optima-grade. Gradient elution was as follows: 1% B for the first 2 min, then ramped to 60% B by 3 min, to 70% B by 7 min, to 95% B by 13 min, followed by a hold until 14 min and finally returned to 1% B, followed by a further 5.8 min equilibration time. The flow was constant at 100 μL/min and column temperature was kept at 50°C, while samples were maintained at 4°C.

Detection was performed with a high resolution Synapt G2 HDMS mass spectrometer (30,000 FWHM) equipped with an electrospray ionization source operating in negative ion mode. The system was controlled using MassLynx® ver. 4.1, tuning and calibration were performed using standard solutions, lucine enkaphenlin and sodium formate, respectively, provided by Waters Corporation (Milford, MA, USA). TargetLynx® ver. 4.1 was used for data analysis of the target compounds, and the relative ratio of each analyte's chromatographic peak area to the internal standard was calculated for subsequent analysis. The Synapt G2 system was permanent calibrated by infusing every 10 seconds the lock mass solution during the analysis of a sample.

## **Water chemistry analysis results: Chemical oxygen demand (COD) and nitrogen removal, and biomass growth**

Table S1 summarizes the permeate COD, NH<sub>4</sub>-N and TIN (including NH<sub>4</sub>-N, NO<sub>3</sub>-N and NO<sub>2</sub>-N) concentrations under different supplemented NH<sub>4</sub>-N concentrations at an hydraulic retention time (HRT) of 48 hours. As for the permeate water quality at different HRTs, Table S2 is presented. Figure S1 A, B, C and D demonstrate COD, NH<sub>4</sub>-N, NO<sub>2</sub>-N and NO<sub>3</sub>-N

concentrations over time, respectively. The permeate COD level throughout the study was close to that of the original OSPW COD. To better understand COD changes during the MBR process, t-test was conducted between original OSPW COD and permeate COD concentrations within each of the six stages. Compared with original OSPW COD, t-test P values for MBR permeate COD are 0.162, 0.851, 0.519, and 0.289 at A75H48, A50H48, A25H48, and A25H72, respectively. Thus, the MBR process did not significantly change the OSPW indigenous COD ( $P \gg 0.05$ ) over the four stages. In contrast, MBR permeate at A25H24 and A25H12 showed significant COD reduction ( $P < 0.05$ ) with a P of 0.017 and 0.002, respectively, implying that the operating conditions used at A25H24 and A25H12 were more favourable for OSPW indigenous COD degradation. Average COD degradation rates of 10.9% and 10.7% were achieved in the MBR at A25H24 and A25H12, respectively. The better COD removal in those two stages might result from enhancement of rejection by biofouling layer (Khor et al., 2007) given that more frequent severe membrane fouling were witnessed within the two periods (data not shown).

Table S3 describes MLSS and MLVSS concentrations and MLVSS/MLSS ratios under different operating conditions. As recirculation was performed from the aerobic tank to the anoxic tank at a rate of 2-fold the influent flowrate, an average value of the measured solids concentrations in the anoxic and aerobic tank was calculated for each sampling day. The MLVSS/MLSS ratio was relatively stable within a range of 0.66 – 0.74 over the whole study in spite of different operating conditions. The typical MLVSS/MLSS ratio is 0.8 – 0.9 in an activated sludge system (Metcalf et al., 2003). The lower MLVSS/MLSS ratio in this study could be attributed to the long SRT. In Table S3, the MLSS and MLVSS concentrations behave in great congruity. Thus, MLVSS is picked to describe how biomass concentration changed over time under each operating condition. When the HRT was shortened to 24 hours at A25H24 and 12 hours at A25H12, the MLVSS

concentration fell to an average level of ~2390 mg/L and ~3020 mg/L, respectively. The bacterial growth in the system was likely to be impacted by the intensified OSPW organic loading under shorter HRTs.

Table S1 Permeate COD and inorganic nitrogen under different NH<sub>4</sub>-N concentrations (HRT = 48 hours)

| <b>Supplemented<br/>NH<sub>4</sub>-N</b> | <b>COD</b> | <b>COD<br/>removal</b> | <b>NH<sub>4</sub>-N</b> | <b>NH<sub>4</sub>-N<br/>removal</b> | <b>TIN</b> | <b>TIN<br/>removal</b> |
|------------------------------------------|------------|------------------------|-------------------------|-------------------------------------|------------|------------------------|
| mg/L                                     | mg/L       | %                      | mg/L                    | %                                   | mg/L       | %                      |
| 75                                       | 211.4±28.1 | -5.4±9.4               | 0.16±0.21               | 99.8±0.3                            | 11.1±10.6  | 86.2±13.1              |
| 50                                       | 206.4±22.5 | -3.3±12.5              | 0.06±0.12               | 99.9±0.2                            | 26.9±11.1  | 67.0±13.3              |
| 25                                       | 220.8±20.7 | 1.3±12.5               | 0.39±0.96               | 98.4±4.0                            | 5.6±3.5    | 93.0±4.2               |

Table S2 Permeate COD and inorganic nitrogen at different HRTs (25 mg NH<sub>4</sub>-N/L)

| <b>HRT</b> | <b>COD</b> | <b>COD removal</b> | <b>NH<sub>4</sub>-N</b> | <b>NH<sub>4</sub>-N removal</b> | <b>TIN</b> | <b>TIN removal</b> |
|------------|------------|--------------------|-------------------------|---------------------------------|------------|--------------------|
| hours      | mg/L       | %                  | mg/L                    | %                               | mg/L       | %                  |
| 72         | 238.9±18.6 | 5.8±13.6           | 0.10±0.17               | 99.6±0.7                        | 15.5±6.6   | 80.7±8.0           |
| 48         | 220.8±20.7 | 1.3±12.5           | 0.39±0.96               | 98.4±4.0                        | 5.6±3.5    | 93.0±4.2           |
| 24         | 226.1±29.9 | 10.9±2.0           | 0.18±0.21               | 99.4±0.8                        | 12.2±1.4   | 84.6±1.8           |
| 12         | 209.0±14.3 | 10.7±3.5           | 0.06±0.09               | 99.8±0.4                        | 20.4±6.9   | 74.7±8.3           |

Table S3 Biomass concentrations and MLVSS/MLSS ratios at different operating conditions

| <b>Operating condition</b> | <b>Biomass concentration</b> |             | <b>MLVSS/MLSS</b> |
|----------------------------|------------------------------|-------------|-------------------|
|                            | MLVSS (mg/L)                 | MLSS (mg/L) |                   |
| A75H48                     | 3636±689                     | 4982±949    | 0.73±0.01         |
| A50H48                     | 2965±534                     | 4360±879    | 0.68±0.02         |
| A25H48                     | 3801±252                     | 5340±395    | 0.71±0.01         |
| A25H72                     | 3087±347                     | 4633±548    | 0.67±0.01         |
| A25H24                     | 2386±109                     | 3309±164    | 0.72±0.01         |
| A25H12                     | 3020±239                     | 4288±336    | 0.70±0.01         |



Table S4 Pearson Correlation Coefficient between the major orders and removal rates of classical NAs with different n

| Major orders over the study duration                 | Molecular carbon number n |        |        |        |        |        |        |        |        |        |        |        |        |        |        |
|------------------------------------------------------|---------------------------|--------|--------|--------|--------|--------|--------|--------|--------|--------|--------|--------|--------|--------|--------|
|                                                      | 9                         | 10     | 11     | 12     | 13     | 14     | 15     | 16     | 17     | 18     | 19     | 20     | 21     | 22     | 23     |
| Proteobacteria;c_β-Proteobacteria;o_Rhodocyclales    | 0.122                     | 0.215  | 0.248  | 0.726  | 0.739  | 0.706  | 0.714  | 0.755  | 0.743  | 0.428  | 0.165  | -0.138 | -0.090 | -0.411 | -0.570 |
| Proteobacteria;c_β-Proteobacteria;o_ASSO-13          | -0.364                    | 0.036  | 0.290  | 0.562  | 0.229  | 0.135  | 0.036  | 0.152  | 0.143  | -0.099 | -0.339 | -0.724 | -0.609 | -0.691 | -0.946 |
| Proteobacteria;c_β-Proteobacteria;o_Nitrosomonadales | 0.544                     | -0.059 | 0.207  | 0.277  | -0.128 | -0.226 | -0.289 | -0.183 | -0.159 | -0.353 | -0.561 | -0.833 | -0.664 | -0.680 | -0.821 |
| Bacteroidetes;c_Cytophagia;o_Cytophagales            | 0.670                     | 0.393  | -0.057 | -0.212 | 0.197  | 0.273  | 0.311  | 0.174  | 0.093  | 0.479  | 0.755  | 0.981  | 0.827  | 0.857  | 0.766  |
| Bacteroidetes;c_Flavobacteriia;o_Flavobacteriales    | -0.123                    | -0.072 | 0.363  | -0.090 | -0.435 | -0.446 | -0.445 | -0.478 | -0.405 | -0.280 | -0.289 | -0.407 | -0.629 | 0.056  | 0.088  |
| Bacteroidetes;c_[Saprospirae];o_[Saprospirales]      | -0.042                    | -0.192 | -0.207 | -0.693 | -0.697 | -0.658 | -0.633 | -0.743 | -0.749 | -0.377 | -0.075 | 0.200  | 0.088  | 0.497  | 0.596  |
| Nitrospirae;c_Nitrospira;o_Nitrospirales             | -0.340                    | -0.628 | -0.550 | -0.880 | -0.860 | -0.807 | -0.738 | -0.789 | -0.730 | -0.634 | -0.420 | -0.008 | 0.010  | 0.171  | 0.590  |
| Planctomycetes;c_Phycisphaerae;o_Phycisphaerales     | -0.795                    | -0.698 | -0.320 | -0.353 | -0.661 | -0.695 | -0.668 | -0.569 | -0.455 | -0.776 | -0.916 | -0.831 | -0.634 | -0.673 | -0.301 |
| Proteobacteria;c_β-Proteobacteria;o_Burkholderiales  | 0.075                     | -0.041 | -0.262 | -0.710 | -0.575 | -0.526 | -0.456 | -0.569 | -0.574 | -0.220 | 0.064  | 0.426  | 0.392  | 0.582  | 0.730  |
| Proteobacteria;c_γ-Proteobacteria;o_Xanthomonadales  | -0.634                    | -0.438 | -0.021 | -0.179 | -0.554 | -0.597 | -0.568 | -0.488 | -0.368 | -0.612 | -0.787 | -0.814 | -0.709 | -0.558 | -0.291 |
| Acidobacteria;c_[Chloracidobacteria];o_RB41          | -0.008                    | -0.141 | -0.133 | -0.649 | -0.666 | -0.627 | -0.587 | -0.695 | -0.684 | -0.332 | -0.067 | 0.190  | 0.063  | 0.500  | 0.621  |
| Proteobacteria;c_α-Proteobacteria;o_Rhizobiales      | -0.662                    | -0.436 | -0.477 | -0.443 | -0.509 | -0.532 | -0.420 | -0.319 | -0.205 | -0.562 | -0.730 | -0.457 | -0.056 | -0.563 | -0.097 |
| Cyanobacteria;c_4C0d-2;o_MLE1-12                     | -0.145                    | -0.295 | 0.008  | -0.429 | -0.582 | -0.549 | -0.467 | -0.505 | -0.390 | -0.354 | -0.335 | -0.188 | -0.323 | 0.131  | 0.470  |
| [Thermi];c_Deinococci;o_Deinococcales                | 0.205                     | 0.038  | -0.096 | -0.573 | -0.482 | -0.434 | -0.410 | -0.548 | -0.583 | -0.126 | 0.203  | 0.451  | 0.285  | 0.693  | 0.689  |

Table S5 Pearson Correlation Coefficient between the major orders and removal rates of classical NAs with different Z

| Major orders over the study duration                 | Absolute value of hydrogen deficiency Z |        |        |        |        |        |        |        |        |        |
|------------------------------------------------------|-----------------------------------------|--------|--------|--------|--------|--------|--------|--------|--------|--------|
|                                                      | 0                                       | 2      | 4      | 6      | 8      | 10     | 12     | 14     | 16     | 18     |
| Proteobacteria;c_β-Proteobacteria;o_Rhodocyclales    |                                         | 0.445  | 0.585  | 0.794  | 0.895  | 0.591  | 0.567  | 0.208  | 0.338  | 0.367  |
| Proteobacteria;c_β-Proteobacteria;o_ASSO-13          |                                         | -0.291 | -0.076 | 0.286  | 0.464  | 0.188  | 0.292  | -0.384 | -0.328 | 0.057  |
| Proteobacteria;c_β-Proteobacteria;o_Nitrosomonadales |                                         | -0.560 | -0.440 | -0.061 | 0.150  | -0.053 | 0.152  | -0.614 | -0.578 | -0.166 |
| Bacteroidetes;c_Cytophagia;o_Cytophagales            |                                         | 0.613  | 0.530  | 0.060  | -0.291 | 0.215  | -0.105 | 0.762  | 0.680  | 0.355  |
| Bacteroidetes;c_Flavobacteriia;o_Flavobacteriales    |                                         | -0.543 | -0.576 | -0.398 | -0.376 | -0.347 | -0.114 | -0.350 | -0.426 | -0.070 |
| Bacteroidetes;c_[Saprospirae];o_[Saprospirales]      |                                         | -0.419 | -0.519 | -0.771 | -0.920 | -0.585 | -0.611 | -0.132 | -0.288 | -0.296 |
| Nitrospirae;c_Nitrospira;o_Nitrospirales             |                                         | -0.524 | -0.703 | -0.849 | -0.786 | -0.803 | -0.686 | -0.411 | -0.488 | -0.663 |
| Planctomycetes;c_Phycisphaerae;o_Phycisphaerales     |                                         | -0.784 | -0.855 | -0.526 | -0.162 | -0.620 | -0.257 | -0.897 | -0.846 | -0.723 |
| Proteobacteria;c_β-Proteobacteria;o_Burkholderiales  |                                         | -0.161 | -0.346 | -0.655 | -0.826 | -0.408 | -0.462 | 0.044  | -0.070 | -0.233 |
| Proteobacteria;c_γ-Proteobacteria;o_Xanthomonadales  |                                         | -0.722 | -0.800 | -0.426 | -0.124 | -0.458 | -0.072 | -0.787 | -0.745 | -0.500 |
| Acidobacteria;c_[Chloracidobacteria];o_RB41          |                                         | -0.383 | -0.512 | -0.727 | -0.865 | -0.535 | -0.521 | -0.116 | -0.256 | -0.254 |
| Proteobacteria;c_α-Proteobacteria;o_Rhizobiales      |                                         | -0.376 | -0.613 | -0.385 | -0.048 | -0.332 | -0.013 | -0.646 | -0.517 | -0.679 |
| Cyanobacteria;c_4C0d-2;o_MLE1-12                     |                                         | -0.410 | -0.605 | -0.518 | -0.437 | -0.485 | -0.214 | -0.325 | -0.357 | -0.307 |
| [Thermi];c_Deinococci;o_Deinococcales                |                                         | -0.162 | -0.253 | -0.592 | -0.845 | -0.374 | -0.497 | 0.144  | -0.018 | -0.068 |

Table S6  $\alpha$  diversity parameters of microbial communities at different operating conditions

| Stage  | Parameters (N = 14640 sequences/sample) |                               |                      |
|--------|-----------------------------------------|-------------------------------|----------------------|
|        | Chao1 <sup>a</sup>                      | Observed species <sup>b</sup> | Shannon <sup>c</sup> |
| A75H48 | 1239.3                                  | 551                           | 5.29                 |
| A50H48 | 882.5                                   | 480                           | 5.16                 |
| A25H48 | 1055.2                                  | 485                           | 4.39                 |
| A25H72 | 948.9                                   | 496                           | 4.88                 |
| A25H24 | 890.1                                   | 439                           | 4.80                 |
| A25H12 | 732.0                                   | 427                           | 4.31                 |

a. Chao1 index is usually used to estimate the total number of species within a community;

b. Observed species refers to the total count of unique OTUs in the sample;

c. Shannon index is a value of evenness that combines species richness and abundance to describe how different species are numerically distributed within a community.

Table S7 Total abundances of top 5 identified genera under each operating condition

| <b>Stages</b> | <b>Count of total genera</b> | <b>Count of the 5% most abundant genera</b> | <b>Total abundance of the 5% most abundant genera</b> |
|---------------|------------------------------|---------------------------------------------|-------------------------------------------------------|
| A75H48        | 177                          | 9                                           | 79%                                                   |
| A50H48        | 151                          | 8                                           | 75%                                                   |
| A25H48        | 181                          | 9                                           | 90%                                                   |
| A25H72        | 132                          | 7                                           | 70%                                                   |
| A25H24        | 98                           | 5                                           | 73%                                                   |
| A25H12        | 122                          | 6                                           | 83%                                                   |

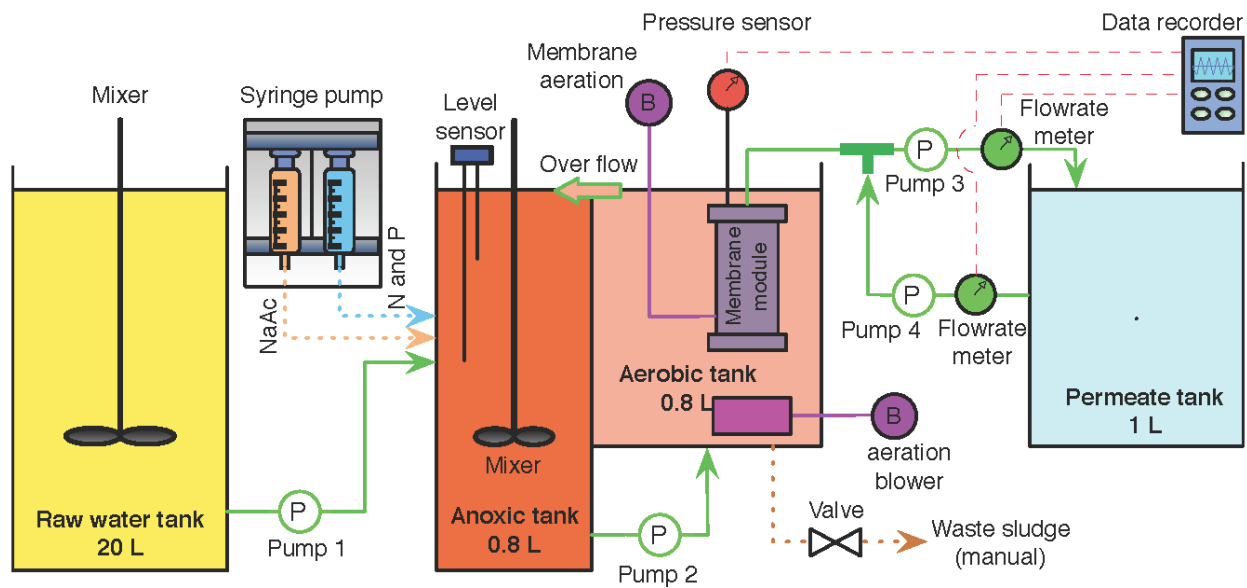

Figure S1 Schematic diagram of the MBR configuration (Adapted from Xue et al. (2016)).

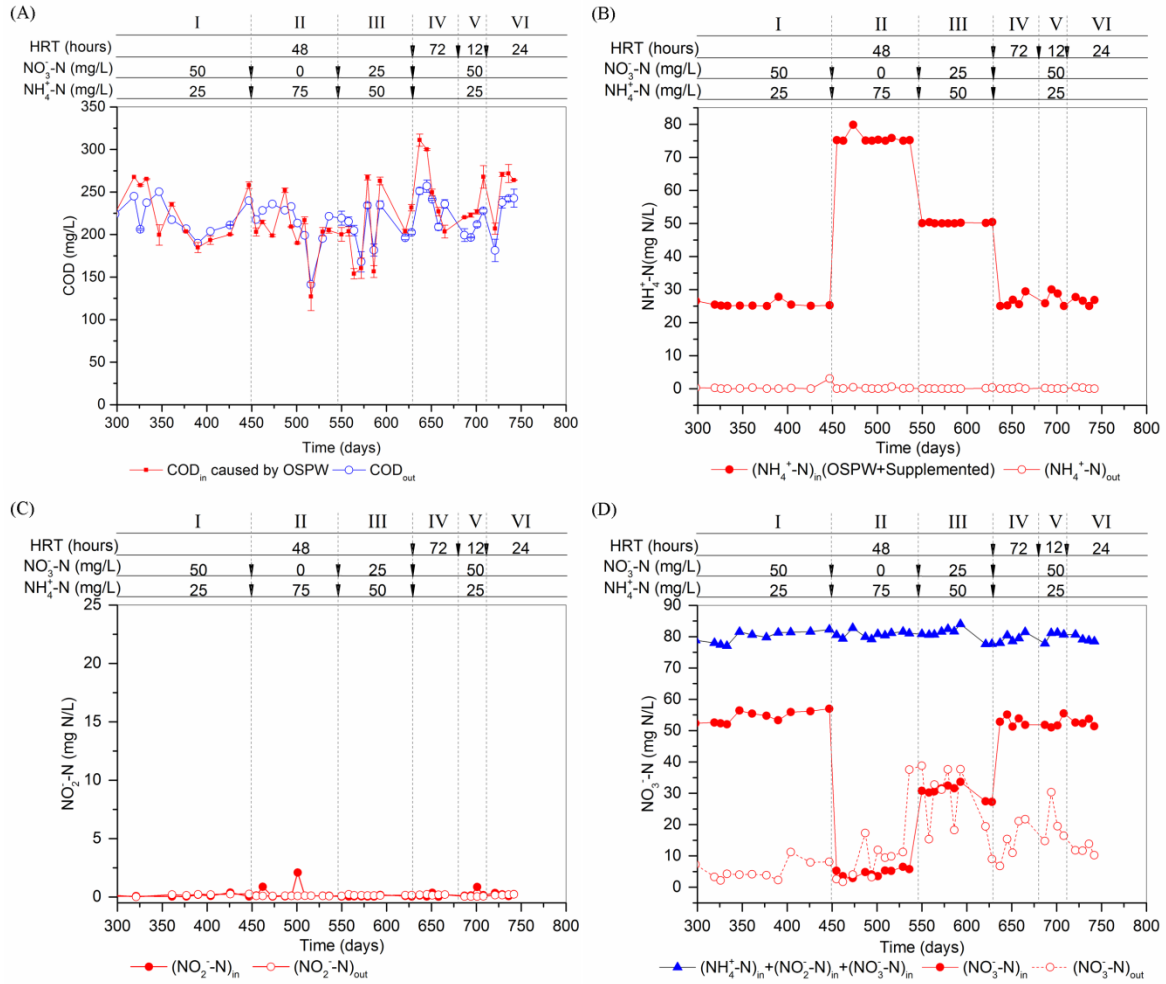

Figure S2 Water chemistry parameters over time: (A) COD; (B) NH<sub>4</sub>-N; (C) NO<sub>2</sub>-N; and (D) NO<sub>3</sub>-N. (Note: Since ammonium and nitrate were supplemented directly into the MBR anoxic tank with pumped syringes, influent NH<sub>4</sub>-N in chart B is a sum of OSPW indigenous NH<sub>4</sub>-N and supplemented NH<sub>4</sub>-N. Similarly, influent NO<sub>3</sub>-N concentration in chart D is a sum of OSPW indigenous NO<sub>3</sub>-N and supplemented NO<sub>3</sub>-N.)

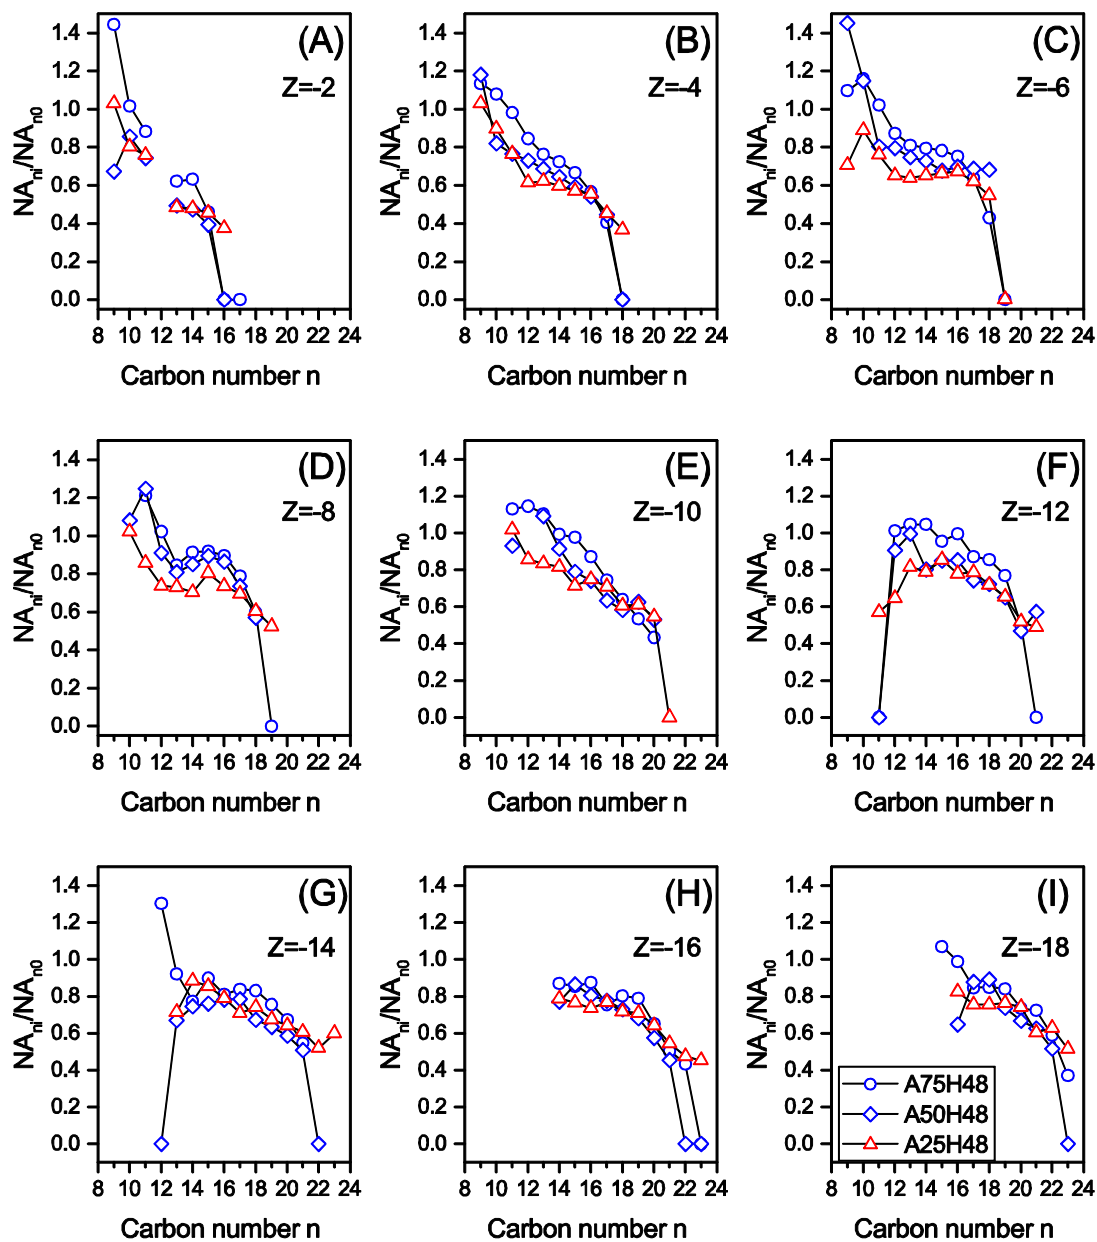

Figure S3 The relative remaining abundance of NAs with different carbon numbers ( $NA_{ni}/NA_{n0}$ ) within each Z series of the permeate samples under different supplemented  $NH_4-N$  concentrations

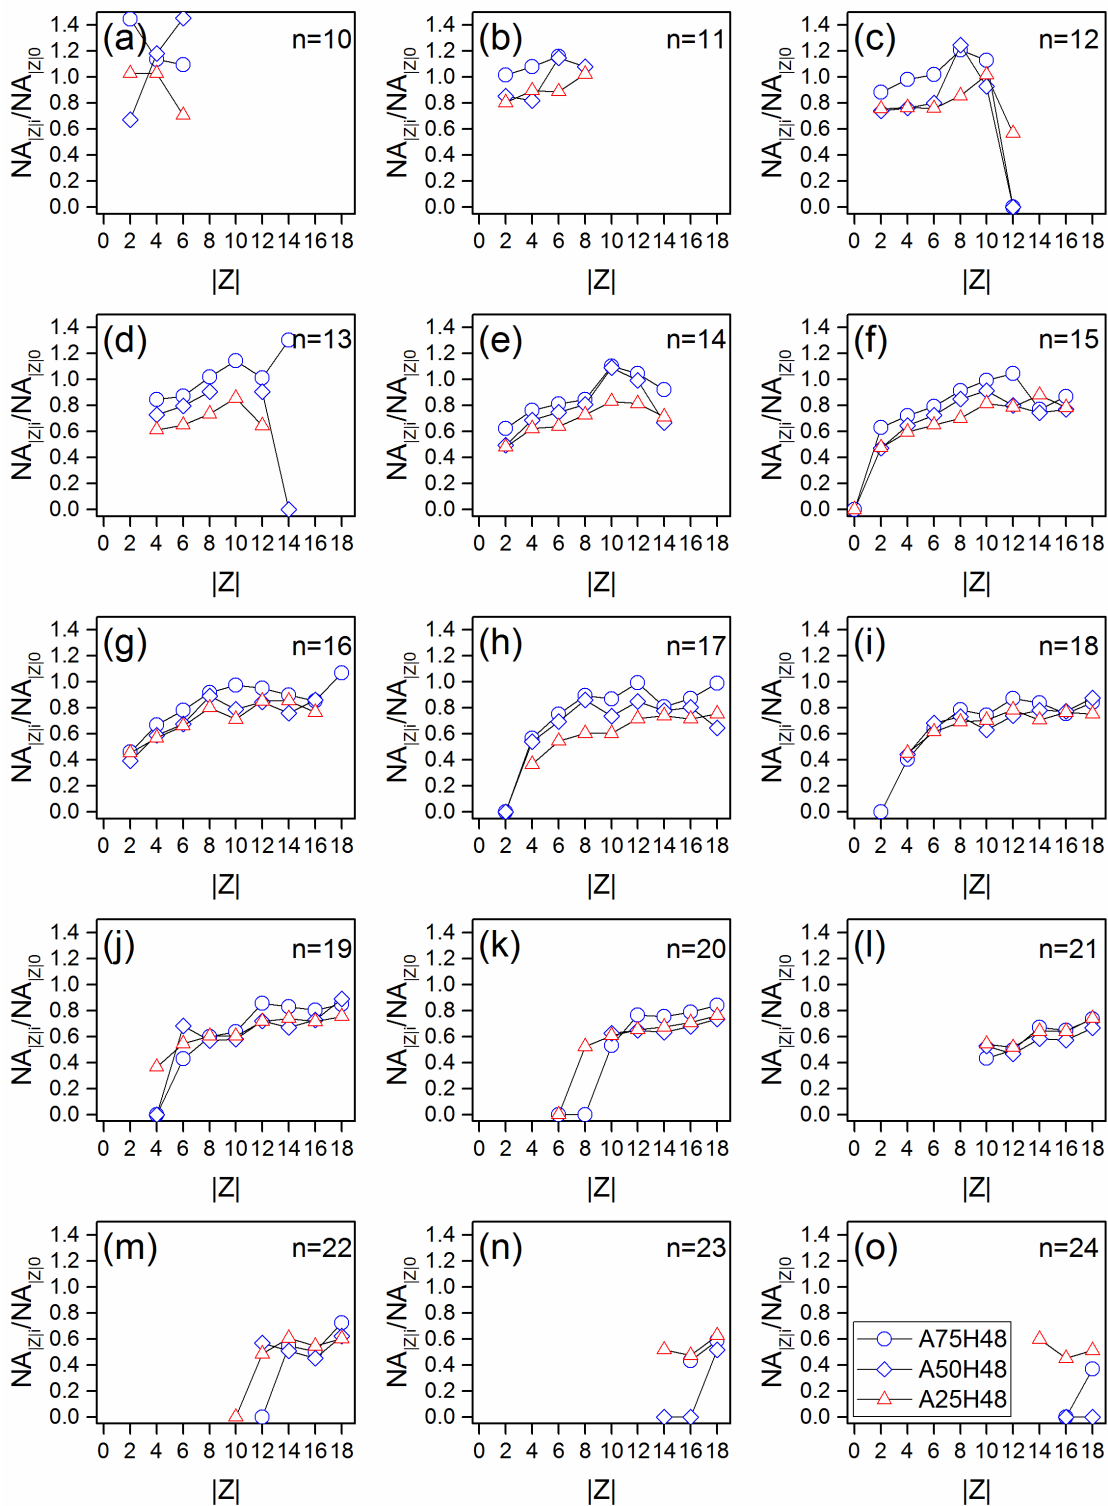

Figure S4 The relative remaining abundance of NAs with different hydrogen deficiencies ( $NA_{Zi}/NA_{Z0}$ ) within each  $n$  series of the permeate samples under different supplemented  $NH_4-N$  concentrations



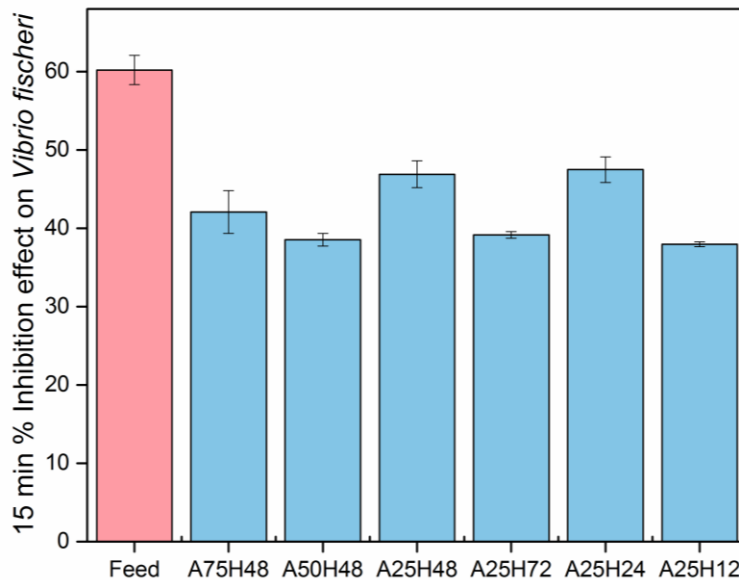

Figure S5 Microtox toxicity of the MBR feed and permeates based on the 81.9% screening test

## References

Chelme-Ayala, P., El-Din, M.G., Smith, D.W., 2010. Degradation of bromoxynil and trifluralin in natural water by direct photolysis and UV plus H(2)O(2) advanced oxidation process. *Water research* 44, 2221-2228.

Federation, W.E., Association, A.P.H., 2005. *Standard methods for the examination of water and wastewater*. American Public Health Association (APHA): Washington, DC, USA.

Khor, S.L., Sun, D.D., Liu, Y., Leckie, J.O., 2007. Biofouling development and rejection enhancement in long SRT MF membrane bioreactor. *Process Biochemistry* 42, 1641-1648.

Metcalf, E., Eddy, H., Tchobanoglous, G., Burton, F., Stensel, H.D., 2003. *Wastewater Engineering: Treatment and Reuse*, Fourth ed. McGraw-Hill, New York.

Xue, J., Zhang, Y., Liu, Y., El-Din, M.G., 2016. Treatment of oil sands process-affected water (OSPW) using a membrane bioreactor with a submerged flat-sheet ceramic microfiltration membrane. *Water research* 88, 1-11.
